# Supplementary material for: Triplex inducer-directed self-assembly of single-walled carbon nanotubes: a triplex DNA-based approach for controlled manipulation of nanostructures
Source: PubMed Central journal article supplement — Nucleic Acids Res. 2011 Jan 10;39(9):3939–48. doi: 10.1093/nar/gkq1347 (PMC3089474; doi:10.1093/nar/gkq1347), 2011-01-10
Supplement: supp_gkq1347_Supporting_Information1.pdf [file supp_gkq1347_Supporting_Information1.pdf]

## Supporting Figures

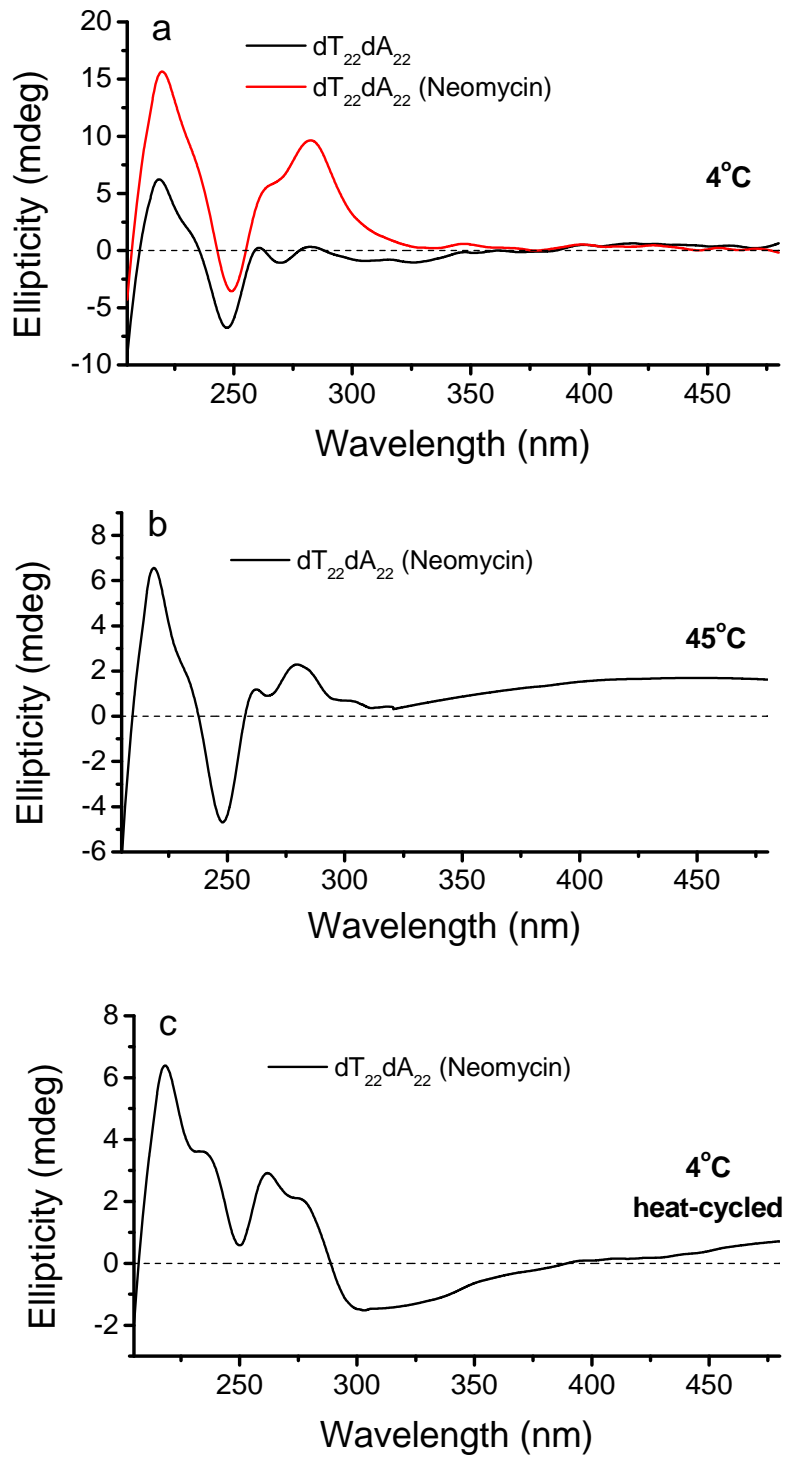

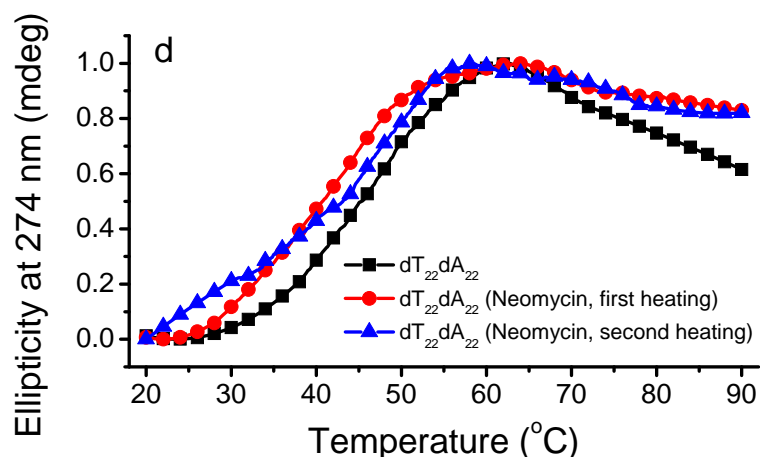

**Figure S1.** CD spectra of duplex  $dA_{22}\cdot dT_{22}$  samples. (a) Duplex  $dA_{22}\cdot dT_{22}$  sample with and without added neomycin at 4 °C prior to heating. (b) Spectra of duplex  $dA_{22}\cdot dT_{22}$  sample with neomycin at 45 °C. (c) Heat-cycled spectrum of  $dA_{22}\cdot dT_{22}$  sample in the presence of neomycin at 4 °C. (d) CD melting profiles for 22mer duplex  $dA_{22}\cdot dT_{22}$  sample at wavelengths selected and the first and second heating of duplex  $dA_{22}\cdot dT_{22}$  after the addition of neomycin. DNA concentrations were 22  $\mu$ M in base pair. Neomycin concentration was 0.5 molar equivalents per base pair (11  $\mu$ M).

The CD spectrum of duplex  $dA_{22}\cdot dT_{22}$  at 4 °C changes dramatically upon the addition of 0.5 molar equivalents of neomycin per DNA base pair (Figure S1a). These changes include the appearance of a substantial positive CD band (or bands) near 280 nm and 225 nm. However, typical CD bands of triplex DNA with intercalated compound at  $\sim$ 340 and  $\sim$ 440 nm are non-existent. This indicates that neomycin does not cause the formation of triplex DNA at 4 °C. Upon heating of the  $dA_{22}\cdot dT_{22}$  sample with added neomycin to 45 °C dramatically reduces the magnitude of the duplex-specific neomycin CD bands at 280 and 225 nm (Figure S1b); small positive bands of triplex at  $\sim$ 340 and  $\sim$ 440 nm (Figure S1b) are also not observed. Additionally, the melting profile of the  $dA_{22}\cdot dT_{22}$  sample in the presence of neomycin exhibits a transition at 46 °C (Figure S1d), which is similar with the duplex  $dA_{22}\cdot dT_{22}$  itself. Thus, the 46 °C transition in the duplex sample with neomycin can be assigned

to the melting of duplex  $dA_{22} \cdot dT_{22}$ . So, these results clearly indicate that neomycin can not cause the strands of  $dA_{22} \cdot dT_{22}$  to repartition into an equimolar amount of triplex  $dT_{22} \cdot dA_{22} \cdot dT_{22}$  and  $dA_{22}$ .

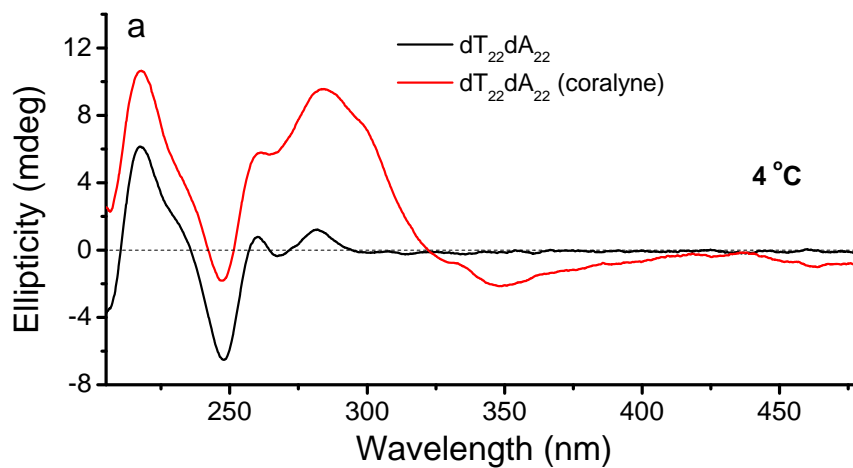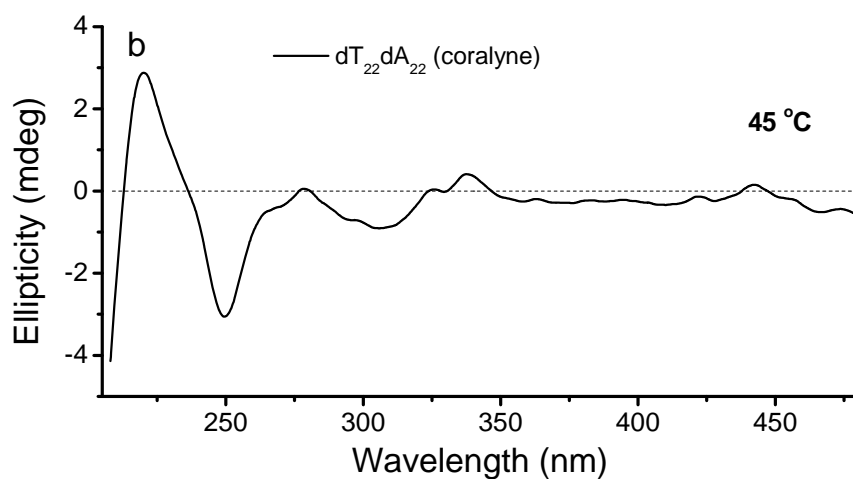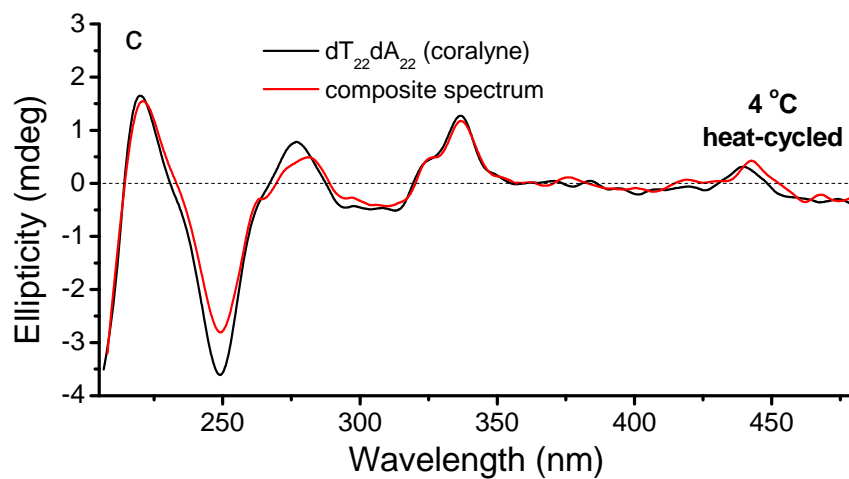

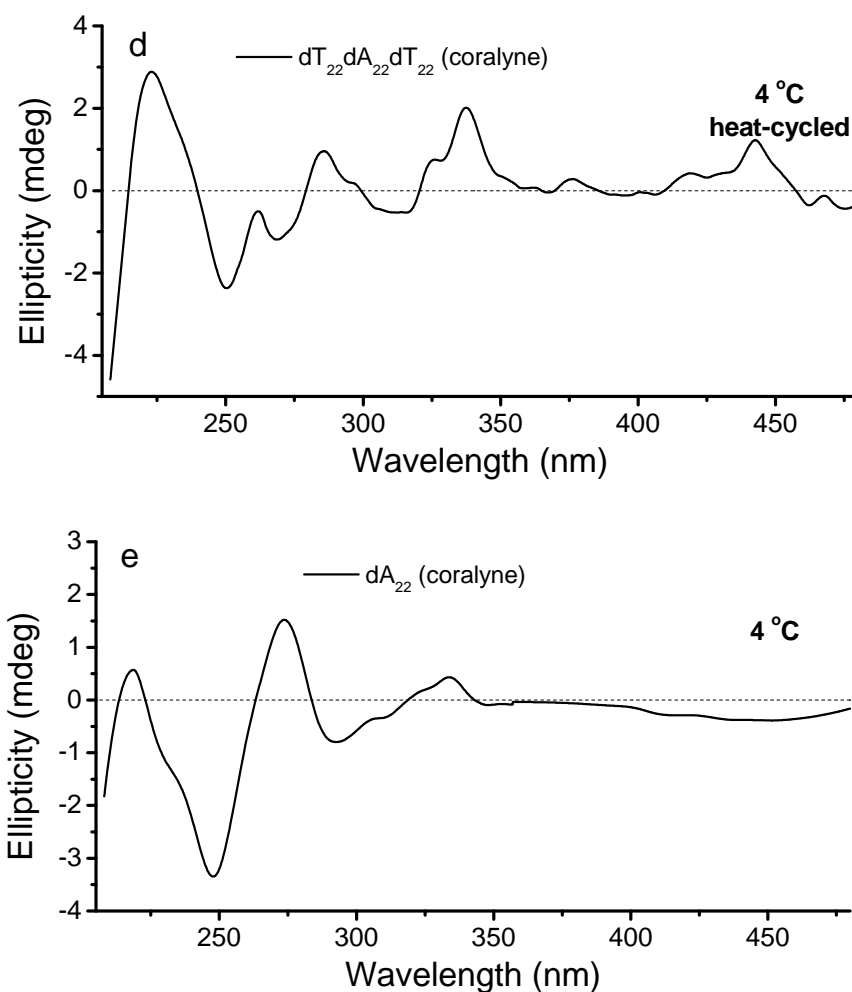

**Figure S2.** CD spectra of duplex  $dA_{22}\cdot dT_{22}$  samples that illustrate duplex disproportionation. (a) Duplex  $dA_{22}\cdot dT_{22}$  sample with and without added coralyne at 4 °C prior to heating. (b) Spectra of duplex  $dA_{22}\cdot dT_{22}$  sample with coralyne at 45 °C. (c) Heat-cycled spectrum of disproportioned  $dA_{22}\cdot dT_{22}$  sample in the presence of coralyne at 4 °C and composite spectrum {sum of spectra acquired at 4 °C:  $[0.5 \times \text{triplex } dT_{22}\cdot dA_{22}\cdot dT_{22} \text{ with } 0.5 \text{ molar equivalents of coralyne}] + [0.50 \times \text{single stranded } dA_{22} \text{ with } 0.5 \text{ molar equivalents of coralyne}]$ }. (d) Spectra of triplex  $dT_{22}\cdot dA_{22}\cdot dT_{22}$  at 4 °C after heat cycling with coralyne. (e) Spectra of  $dA_{22}$  sample with coralyne at 4 °C. DNA concentrations were 22  $\mu\text{M}$  in nucleotide, base pair or base triplet, respectively. Coralyne concentration was 0.5 molar equivalents per nucleotide, base pair or base triplet, respectively.

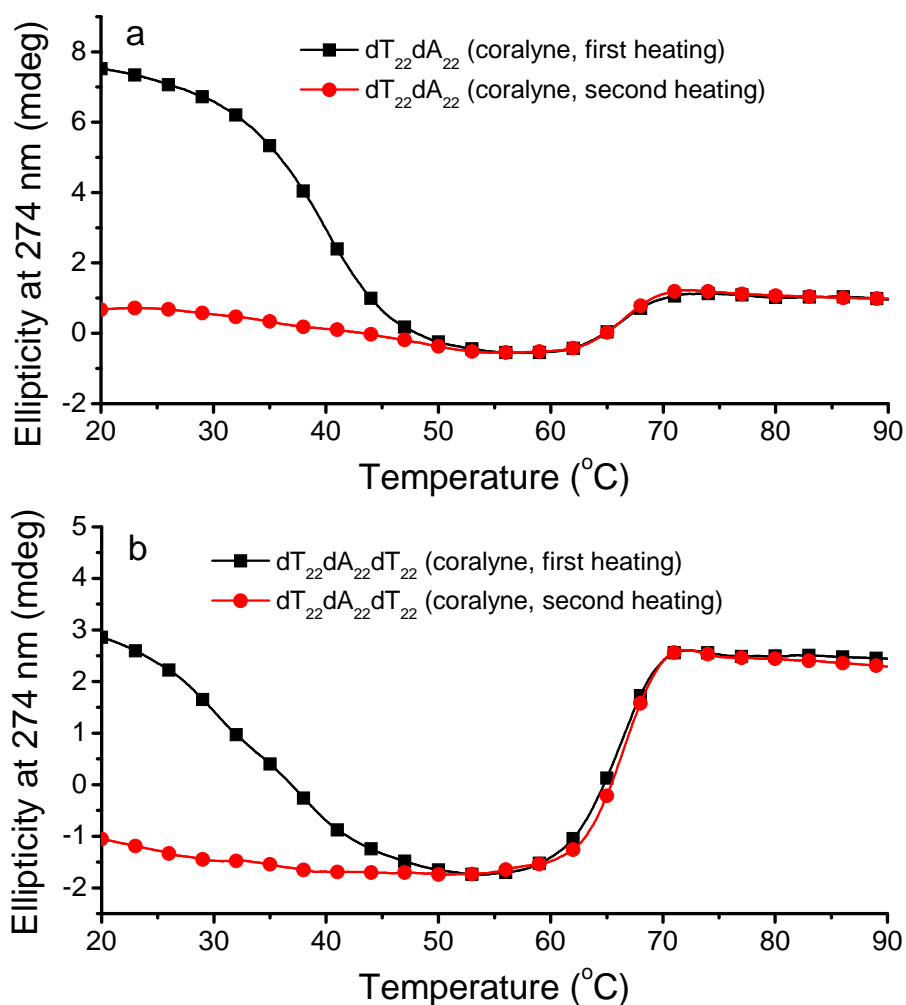

**Figure S3.** CD melting profiles for 22mer DNA samples at wavelengths selected to show structural transitions. (a) First and second heating of duplex  $dA_{22} \cdot dT_{22}$  after the addition of coralyne; the duplex disproportionation transition is observed at 39.5 °C during the first heating and triplex melting is observed at 66.1 °C in both the first and second heating of the sample. (b) First and second heating of a triplex  $dT_{22} \cdot dA_{22} \cdot dT_{22}$  sample after the addition of coralyne indicates triplex melting at 66.2 °C. The first heating of this sample after the addition of coralyne also shows a transition centered at 33.6 °C, which is assigned to the reorganization of DNA strands from partial duplex and partial triplex to complete triplex. DNA concentrations were 22  $\mu$ M in base pair or base triplet, respectively. Coralyne concentration was 0.5 molar equivalents per base pair or base triplet, respectively.

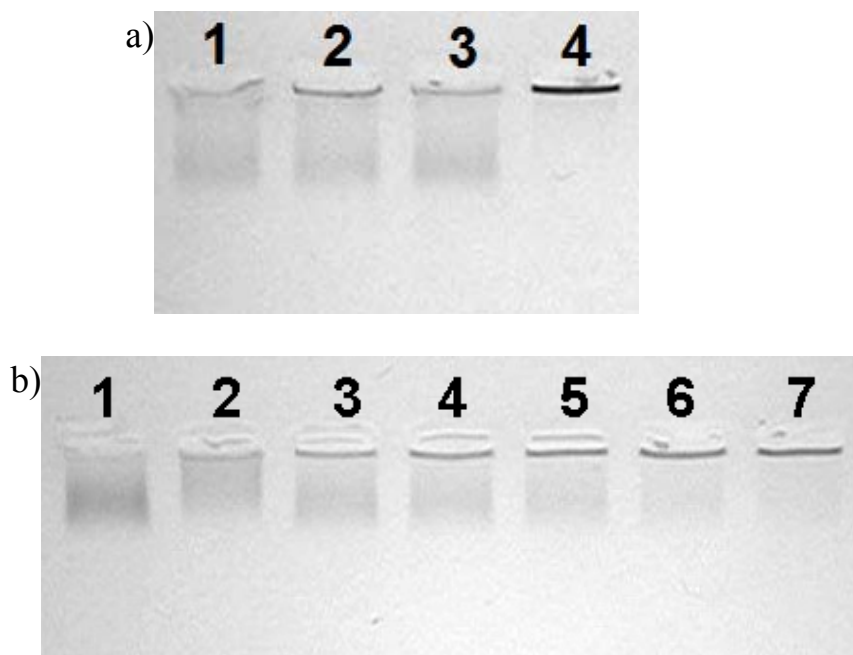

**Figure S4.** Electrophoretic mobility of DNA-SWNTs conjugates in the absence or presence of coralyne. a) SWNTs-dT<sub>22</sub> alone (lane 1) and in the presence of 1  $\mu$ M coralyne (lane 3); SWNTs-dT<sub>22</sub>·dA<sub>22</sub> alone (lane 2) and in the presence of 1  $\mu$ M coralyne (lane 4); b) SWNTs-dT<sub>22</sub>·dA<sub>22</sub> alone (lane 1) and in the presence of 0.1  $\mu$ M (lane 2), 0.2  $\mu$ M (lane 3), 0.4  $\mu$ M (lane 4), 0.6  $\mu$ M (lane 5), 0.8  $\mu$ M (lane 6), 1  $\mu$ M (lane 7) coralyne.
